# Supplementary material
Source: PubMed Central journal article supplement (PMC6646552)
Supplement: ao8b02250_si_001.pdf [file ao8b02250_si_001.pdf]

**Hemp (*Cannabis sativa* L.) seed phenylpropionamides composition and effects on memory dysfunction and biomarkers of neuroinflammation induced by lipopolysaccharide in mice**

Yuefang Zhou<sup>†</sup>, Shanshan Wang<sup>†</sup>, Jianbo Ji<sup>§</sup>, Hongxiang Lou<sup>†</sup>, Peihong Fan<sup>†,\*</sup>

<sup>†</sup>Department of Natural Product Chemistry, Key Lab of Chemical Biology of Ministry of Education, School of Pharmaceutical Sciences, Shandong University, Jinan 250012, China

<sup>§</sup>Department of Pharmacology, School of Pharmaceutical Sciences, Shandong University, Jinan 250012, China

Corresponding author's e-mail address: [fanpeihong@sdu.edu.cn](mailto:fanpeihong@sdu.edu.cn) (P.H. Fan)

1. Identification of standard compounds and TPA

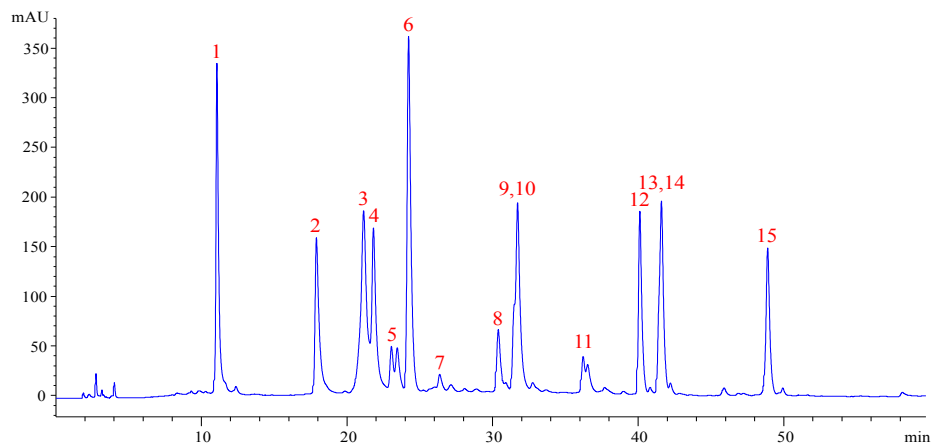

Figure S1. HPLC chromatogram of mixing standard compounds

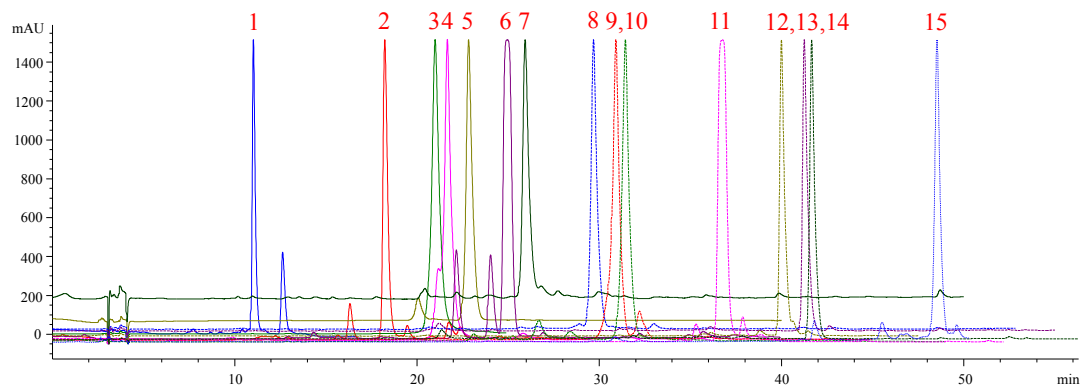

Figure S2. HPLC chromatogram of each standard compound

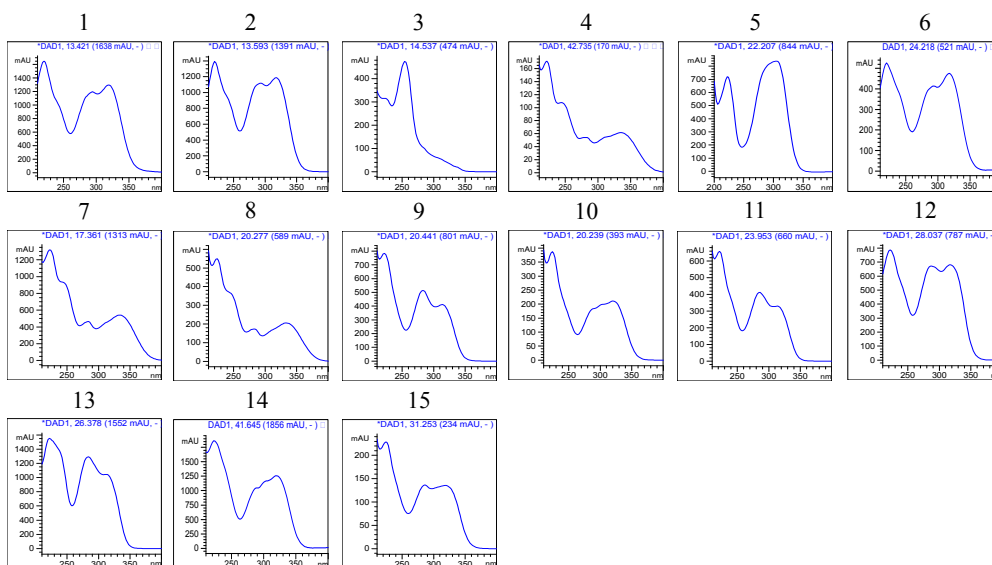

**Figure S3.** UV spectrum of each standard compound

**Table S1** Compounds identified by HPLC, UV, and MS data of mixing standard compounds obtained from HPLC-DAD-MS

| Peak NO. | Identity                                                                                                                                                                                                   | HPLC RT (min) | Molecular weight | Molecular formula                                              | UV $\lambda_{\max}$ (nm) |
|----------|------------------------------------------------------------------------------------------------------------------------------------------------------------------------------------------------------------|---------------|------------------|----------------------------------------------------------------|--------------------------|
| 1        | <i>N-trans</i> -caffeoyloctopamine                                                                                                                                                                         | 11.1          | 315              | C <sub>17</sub> H <sub>17</sub> NO <sub>5</sub>                | 220,290,320              |
| 2        | <i>N-trans</i> -caffeoyltyramine                                                                                                                                                                           | 17.9          | 299              | C <sub>17</sub> H <sub>17</sub> NO <sub>4</sub>                | 220,290,320              |
| 3        | Cannabisin A                                                                                                                                                                                               | 21.1          | 594              | C <sub>34</sub> H <sub>30</sub> N <sub>2</sub> O <sub>8</sub>  | 255                      |
| 4        | Cannabisin B                                                                                                                                                                                               | 21.8          | 596              | C <sub>34</sub> H <sub>32</sub> N <sub>2</sub> O <sub>8</sub>  | 220,245,280,340          |
| 5        | <i>N-trans</i> -coumaroyltyramine                                                                                                                                                                          | 23.1          | 283              | C <sub>17</sub> H <sub>17</sub> NO <sub>3</sub>                | 220,310                  |
| 6        | <i>N-trans</i> -feroyltyramine                                                                                                                                                                             | 24.2          | 313              | C <sub>18</sub> H <sub>19</sub> NO <sub>4</sub>                | 220,290,320              |
| 7        | Cannabisin C                                                                                                                                                                                               | 26.4          | 610              | C <sub>35</sub> H <sub>34</sub> N <sub>2</sub> O <sub>8</sub>  | 225,245,285,335          |
| 8        | Cannabisin D                                                                                                                                                                                               | 30.4          | 624              | C <sub>36</sub> H <sub>36</sub> N <sub>2</sub> O <sub>8</sub>  | 222,245,285,335          |
| 9        | Cannabisin E                                                                                                                                                                                               | 31.6          | 642              | C <sub>36</sub> H <sub>38</sub> N <sub>2</sub> O <sub>9</sub>  | 221,281,315              |
| 10       | 3,3'-demethyl-grossamide                                                                                                                                                                                   | 31.7          | 596              | C <sub>34</sub> H <sub>32</sub> N <sub>2</sub> O <sub>8</sub>  | 225,285,300,320          |
| 11       | Cannabisin M                                                                                                                                                                                               | 36.2          | 596              | C <sub>34</sub> H <sub>32</sub> N <sub>2</sub> O <sub>8</sub>  | 220,285,315              |
| 12       | (2,3- <i>trans</i> )-3-(3-hydroxy-5-methoxyphenyl)- <i>N</i> -(4-hydroxyphenethyl)-7- <i>{(E)-3-[(4-hydroxyphenethyl)amino]-3-oxoprop-1-enyl}</i> -2,3-dihydro-benzo[ <i>b</i> ][1,4]dioxine-2-carboxamide | 40.1          | 610              | C <sub>35</sub> H <sub>34</sub> N <sub>2</sub> O <sub>8</sub>  | 225,281,311              |
| 13       | Cannabisin F                                                                                                                                                                                               | 41.5          | 624              | C <sub>36</sub> H <sub>36</sub> N <sub>2</sub> O <sub>8</sub>  | 221,285,320              |
| 14       | Grossamide                                                                                                                                                                                                 | 41.6          | 624              | C <sub>36</sub> H <sub>36</sub> N <sub>2</sub> O <sub>8</sub>  | 221,285,300,320          |
| 15       | Cannabisin O                                                                                                                                                                                               | 48.9          | 935              | C <sub>54</sub> H <sub>53</sub> N <sub>3</sub> O <sub>12</sub> | 222,285,320              |

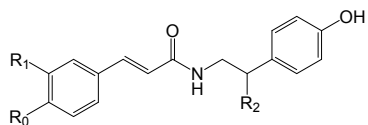

- 1 R<sub>0</sub>=OH R<sub>1</sub>=OH R<sub>2</sub>=OH **N-trans-caffeoyloctopamine**  
 2 R<sub>0</sub>=OH R<sub>1</sub>=OH R<sub>2</sub>=H **N-trans-caffeoyltyramine**  
 5 R<sub>0</sub>=OH R<sub>1</sub>=H R<sub>2</sub>=H **N-trans-coumaroyltyramine**  
 6 R<sub>0</sub>=OH R<sub>1</sub>=OMe R<sub>2</sub>=H **N-trans-feryroyltyramine**

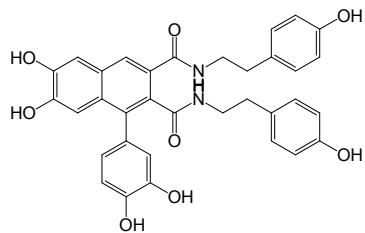

**3 Cannabisin A**

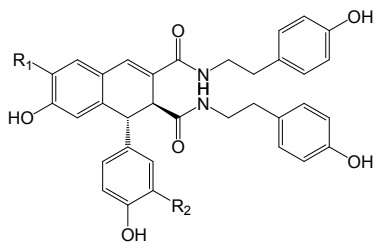

- 4 R<sub>1</sub>=OH, R<sub>2</sub>=OH **Cannabisin B**  
 7 R<sub>1</sub>=OMe, R<sub>2</sub>=OH **Cannabisin C**  
 8 R<sub>1</sub>=OMe, R<sub>2</sub>=OMe **Cannabisin D**

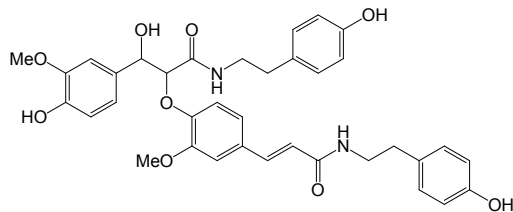

**9 Cannabisin E**

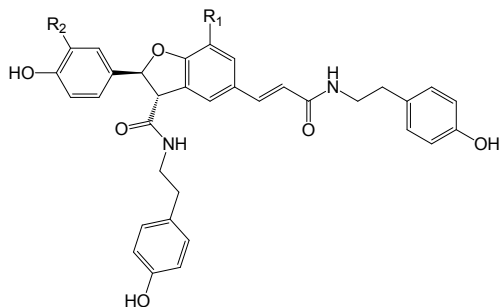

- 10 R<sub>1</sub>=OH, R<sub>2</sub>=OH **3,3'-demethyl-grossamide**  
 14 R<sub>1</sub>=OMe, R<sub>2</sub>=OMe **Grossamide**

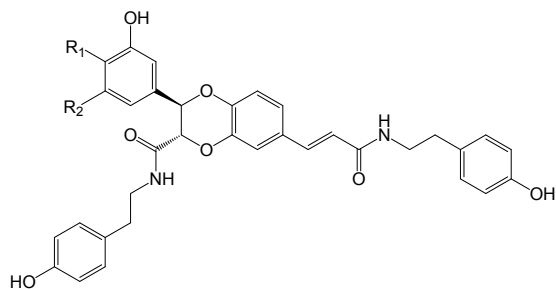

- 11 R<sub>1</sub>=OH, R<sub>2</sub>=H **Cannabisin M**  
 12 R<sub>1</sub>=H, R<sub>2</sub>=OMe **Isocannabisin N**

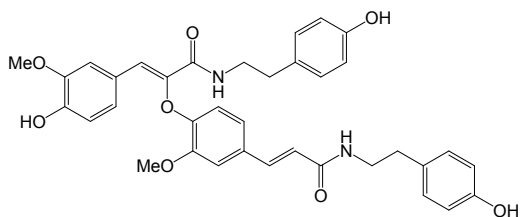

**13 Cannabisin F**

**Figure S4.** Chemical Structures of the identified compounds in Table 1.

## 2. The quantification of TPA

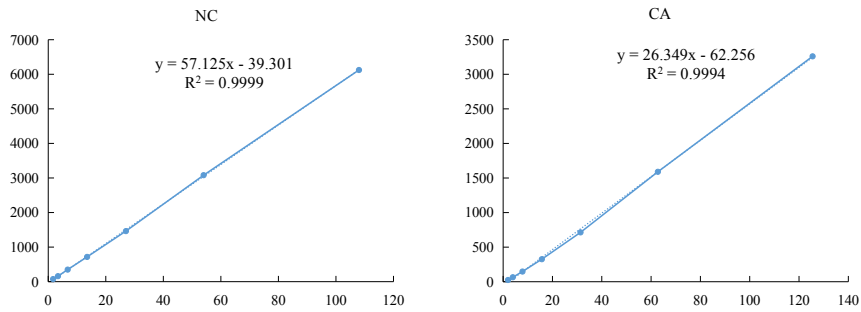

**Figure S5.** The standard curves of NC and CA.

**Table S2** The concentration and peak area of NC and CA

| NO. | NC(µg/mL) | Peak area of NC | CA(µg/mL) | Peak area of CA |
|-----|-----------|-----------------|-----------|-----------------|
| 1   | 108.00    | 6123.9          | 125.50    | 3259.6          |
| 2   | 54.00     | 3080.8          | 62.75     | 1589.8          |
| 3   | 27.00     | 1463.1          | 31.38     | 713.6           |
| 4   | 13.50     | 716.1           | 15.69     | 325.8           |
| 5   | 6.75      | 349.1           | 7.84      | 147.3           |
| 6   | 3.38      | 159.7           | 3.92      | 64.9            |
| 7   | 1.69      | 75.3            | 1.96      | 25.1            |

## 3. Time-line of drug treatment and experimental schedule

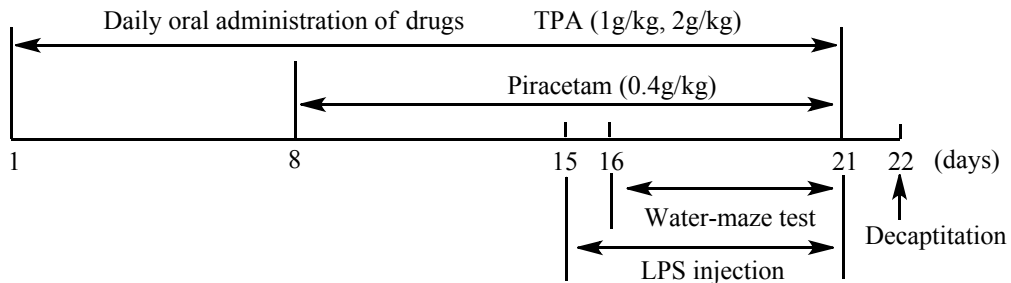

**Figure S6.** Time-line of drug treatment and experimental schedule
